# Supplementary material for: IL-21, Inflammatory Cytokines and Hyperpolarized CD8+ T Cells Are Central Players in Lupus Immune Pathology
Source: MDPI journal article supplement (doi:10.3390/antiox12010181), 2023-01-12
Supplement: s1 [file s1]

| <b>REAGENT</b>                                                                   | <b>CATALOGUE NUMBER</b>               |
|----------------------------------------------------------------------------------|---------------------------------------|
| <b>MILLIPLEX MAP Human TH17 Magnetic Bead Panel - Immunology Multiplex Assay</b> | <b>Millipore – HTH17MAG-14K</b>       |
| <b>Dynabeads™ Untouched™ Human CD8 T Cells Kit</b>                               | <b>Invitrogen- 11348D</b>             |
| <b>BD FACS™ FACS Lysing Solution</b>                                             | <b>BD Biosciences- 349202</b>         |
| <b>Dynabeads™ Human T-Activator CD3/CD28 for T Cell Expansion and Activation</b> | <b>Gibco- 11132D</b>                  |
| <b>Human TruStain FcX™ (Fc Receptor Blocking Solution)</b>                       | <b>Biolegend- 422302</b>              |
| <b>BD Cytofix/Cytoperm™</b>                                                      | <b>BD Biosciences- 554714</b>         |
| <b>eBioscience™ Foxp3 / Transcription Factor Staining Buffer Set</b>             | <b>Invitrogen- 11348D</b>             |
| <b>CellROX™ Deep Red Flow Cytometry Assay Kit</b>                                | <b>Invitrogen- C10491</b>             |
| <b>MitoTracker™ Red CMXRos Dye, for flow cytometry</b>                           | <b>Invitrogen- M46752</b>             |
| <b>Menadione</b>                                                                 | <b>Sigma Aldrich M9429</b>            |
| <b>N-Acetyl-L-cysteine (NAC)</b>                                                 | <b>Sigma Aldrich A9165</b>            |
| <b>Anti-Human CD3 BV510</b>                                                      | <b>BD Biosciences- 740187</b>         |
| <b>Anti-Human CD4 PECy7</b>                                                      | <b>BD Biosciences- 557852</b>         |
| <b>Anti-Human CD8 AF700/BUV395</b>                                               | <b>BD Biosciences- 561453/ 563795</b> |
| <b>Anti-Human CD278 (ICOS) PE</b>                                                | <b>BD Biosciences- 557802</b>         |
| <b>Anti-Human CXCR5(CD185) AF647</b>                                             | <b>BD Biosciences- 558113</b>         |
| <b>Zombie Fixable Viability™ Sampler Kit</b>                                     | <b>Biolegend- 423117</b>              |
| <b>Anti-Human pSTAT3 PE</b>                                                      | <b>BD Biosciences- 562072</b>         |
| <b>Anti-Human pSTAT4 APC</b>                                                     | <b>Invitrogen- 17-9044-42</b>         |
| <b>Anti-Human p-mTOR PECy7</b>                                                   | <b>Invitrogen- 25-9718-42</b>         |

|                                                              |                                                           |
|--------------------------------------------------------------|-----------------------------------------------------------|
| <b>Anti-Human IFN-<math>\gamma</math> BV650/PECy7/AF-647</b> | <b>Biolegend/Invitrogen<br/>502537/ 25-7319-41</b>        |
| <b>Anti-Human IL-10 PE/BV 421</b>                            | <b>Invitrogen/Biolegend-<br/>12-7108-82/ 501421</b>       |
| <b>Anti-Human TNF-<math>\alpha</math> BUV395/AF700</b>       | <b>BD Biosciences-<br/>563996/ 561023</b>                 |
| <b>Anti-Human Eomesdermin PECF594</b>                        | <b>BD Biosciences-<br/>567167</b>                         |
| <b>Anti-Human Granzyme B PE</b>                              | <b>Biolegend-<br/>372208</b>                              |
| <b>Anti-Human Perforin C AF594</b>                           | <b>Biolegend-<br/>308124</b>                              |
| <b>Anti-Human T-bet PECy7</b>                                | <b>Invitrogen-<br/>25-5825-82</b>                         |
| <b>Anti-Human Foxp3 PECy7/R718</b>                           | <b>Invitrogen/ BD Biosciences-<br/>25-4777-42/ 566936</b> |
| <b>Anti-Human CD45 RO BV 605</b>                             | <b>BD Biosciences-<br/>562791</b>                         |
| <b>Anti-Human CD45 RA BUV 496</b>                            | <b>BD Biosciences-<br/>750258</b>                         |
| <b>FlowJO Version 10.8</b>                                   | <b>BD Biosciences</b>                                     |
| <b>Graph Pad Prism 9</b>                                     | <b>Dotmatics Pvt Ltd.</b>                                 |

**Table S1: Reagents and software used in the study**
