# Supplementary material for: IL-21, Inflammatory Cytokines and Hyperpolarized CD8+ T Cells Are Central Players in Lupus Immune Pathology
Source: MDPI journal article supplement (doi:10.3390/antiox12010181), 2023-01-12
Supplement: s1 [file s1]

**Figure S1**

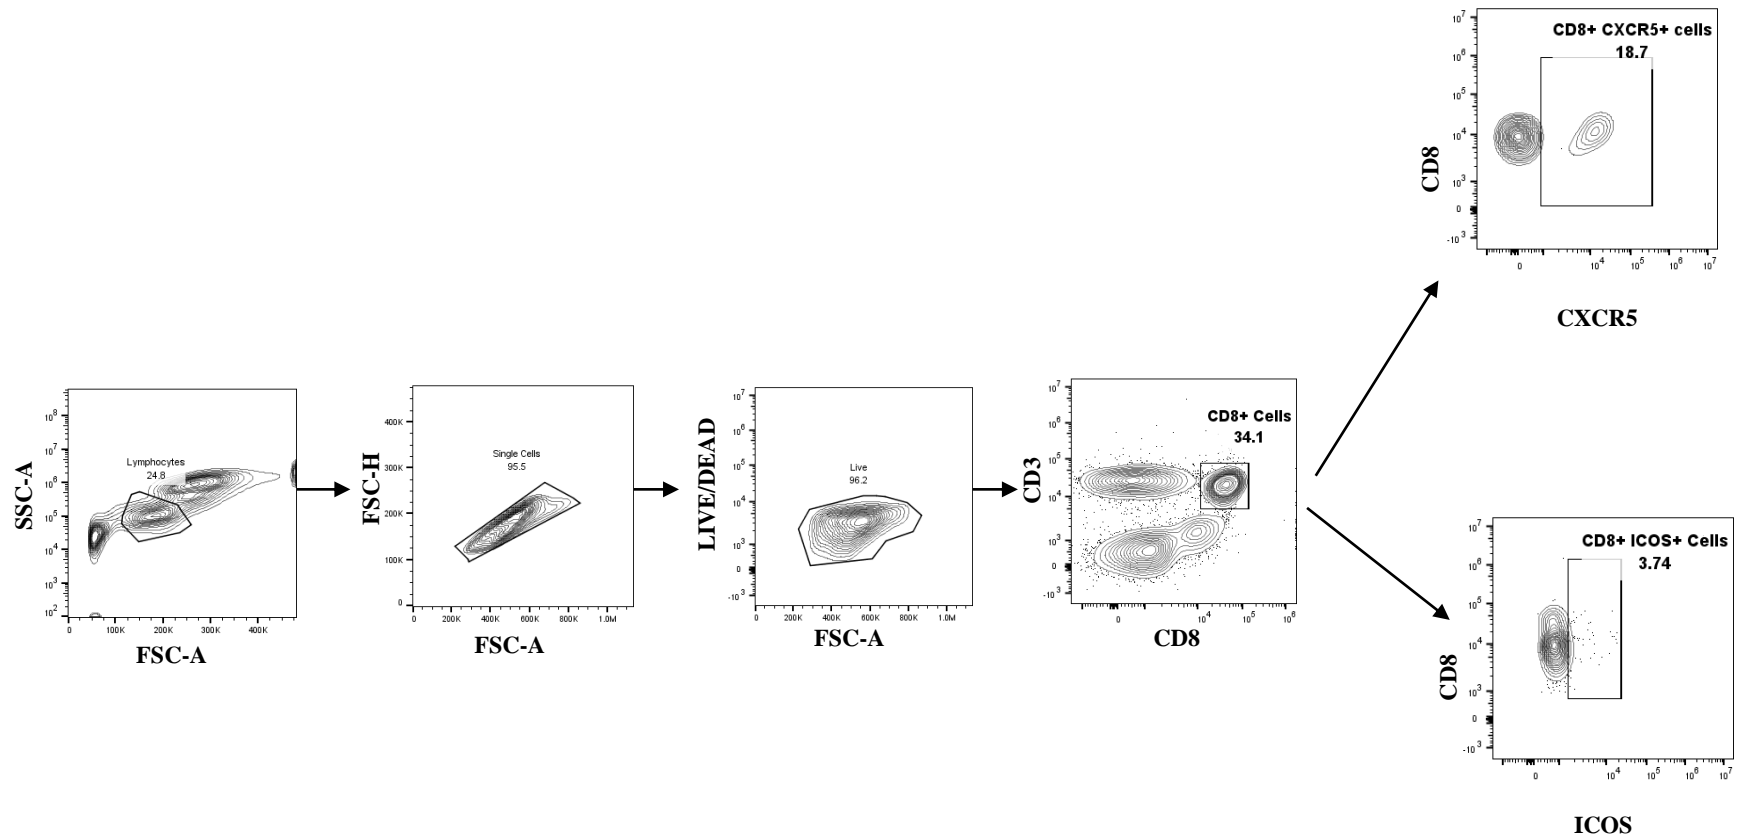

**Figure S1. Gating strategy to assess surface markers from Whole blood of SLE patients and healthy controls.**

**Figure S2a**

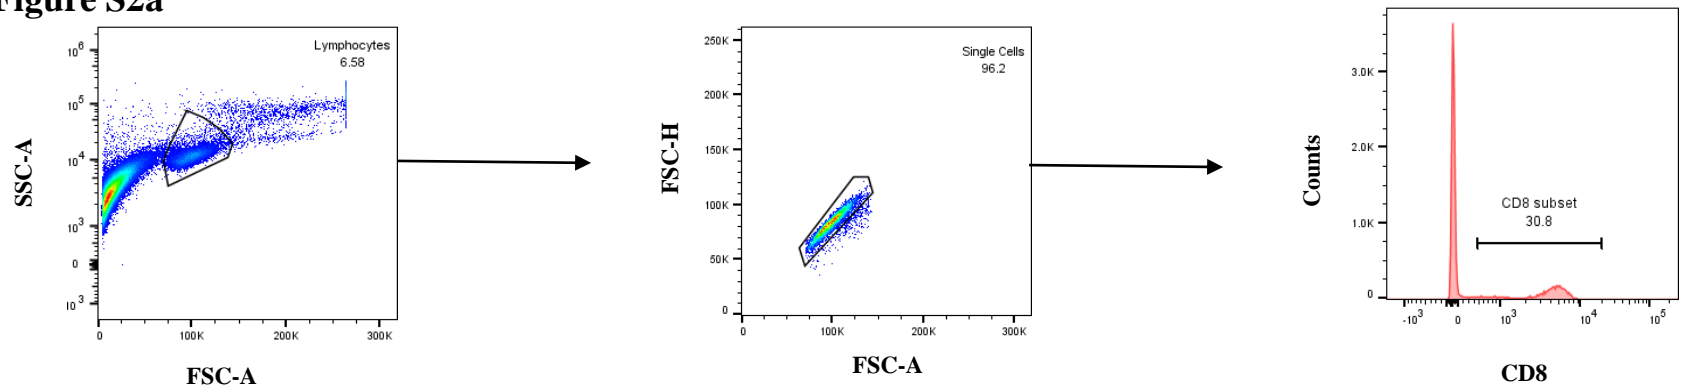

**Figure S2b**

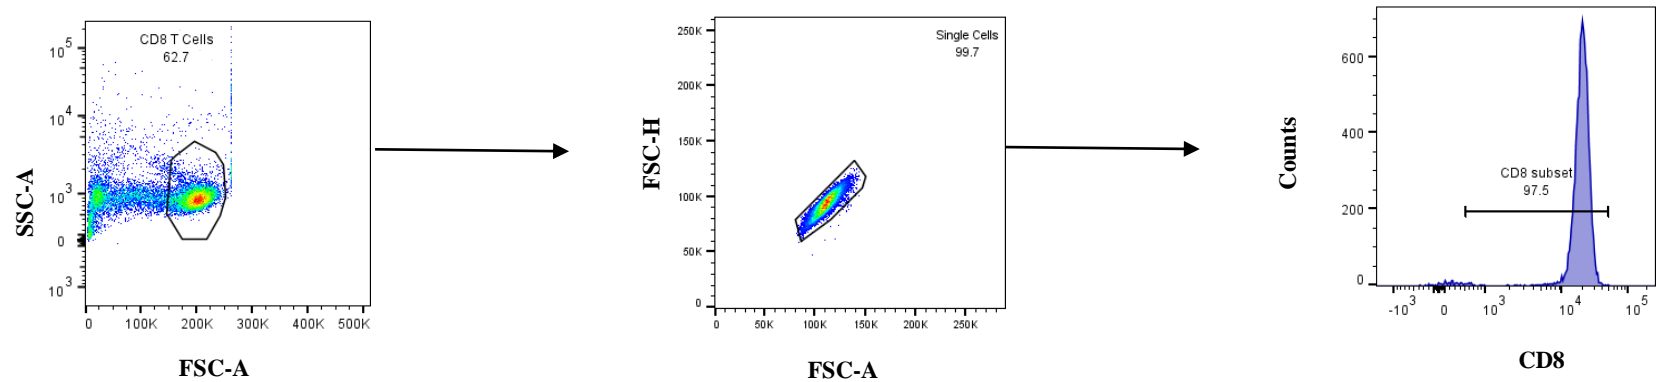

**Figure S2c**

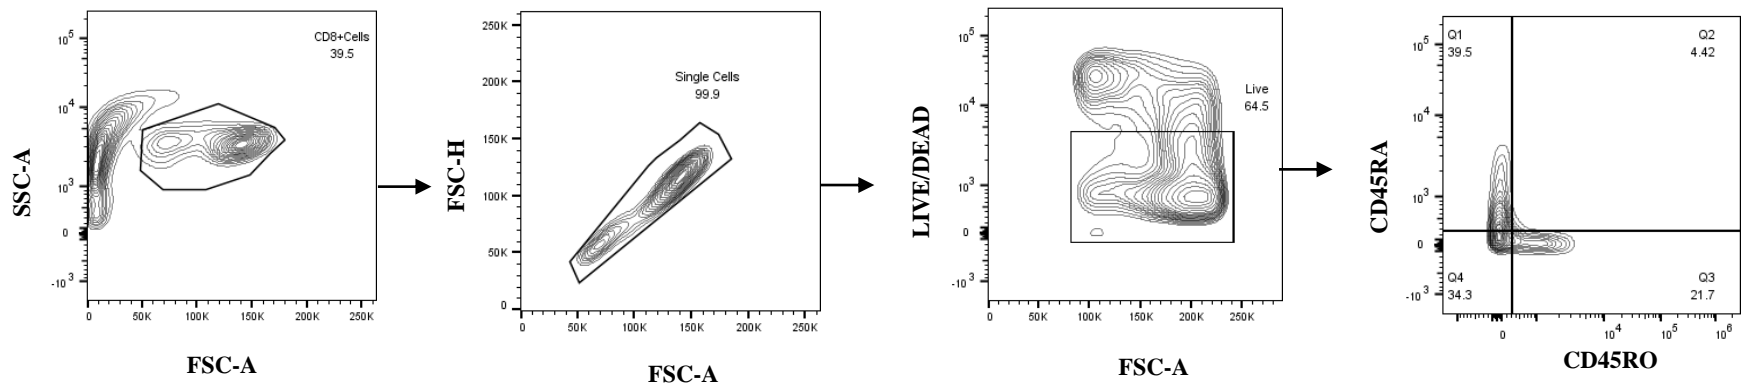

**Figure S2a. Percentage of CD8+ T cells in PBMC of SLE patients. Figure S2b. percentage of purity of CD8+ T cells after isolation.**

**Figure S2c. Gating strategy to determine naïve, effector and memory compartments of CD8+ T cells.**

**Figure S3**

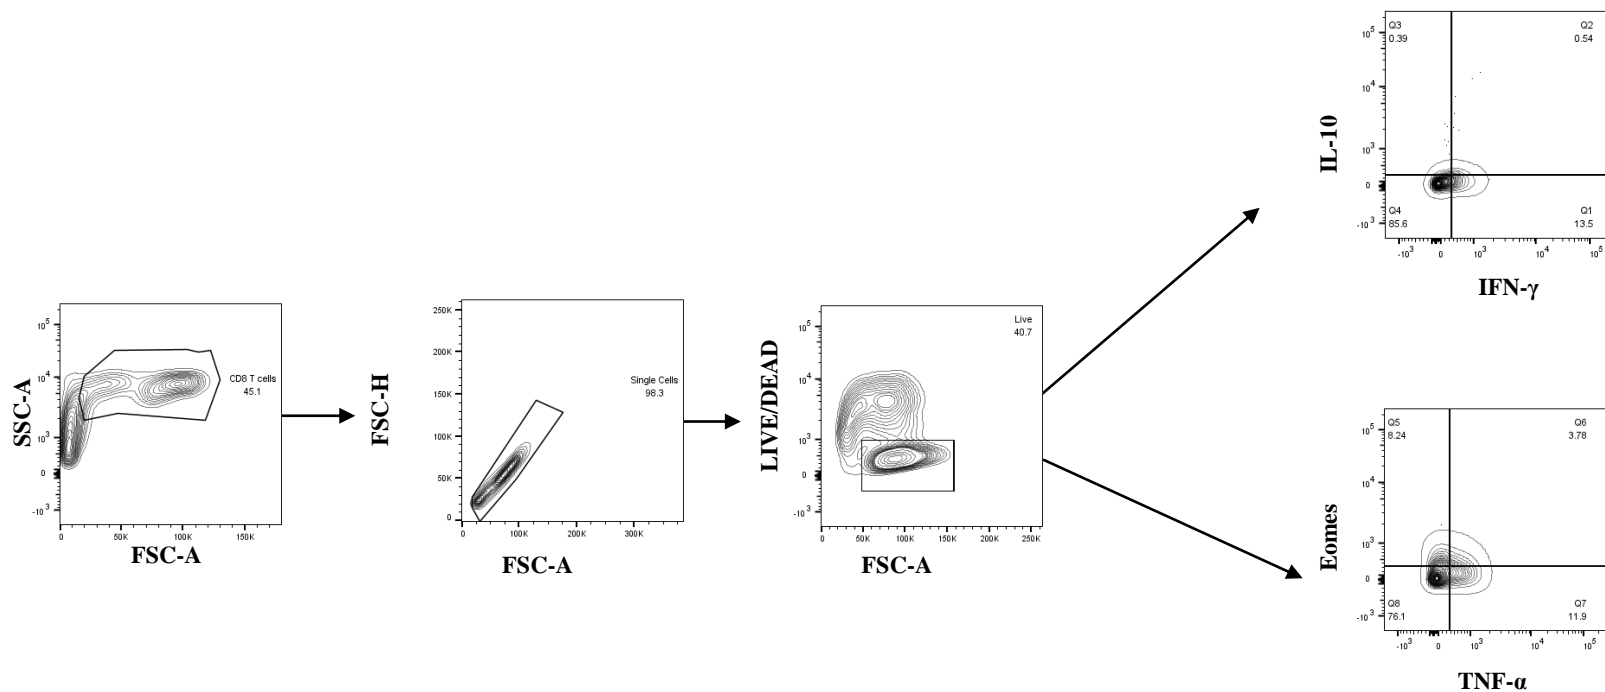

**Figure S3. Gating strategy to determine transcription factor and cytokines staining from CD8<sup>+</sup> cells of SLE Patients and healthy controls.**

**Figure S4**

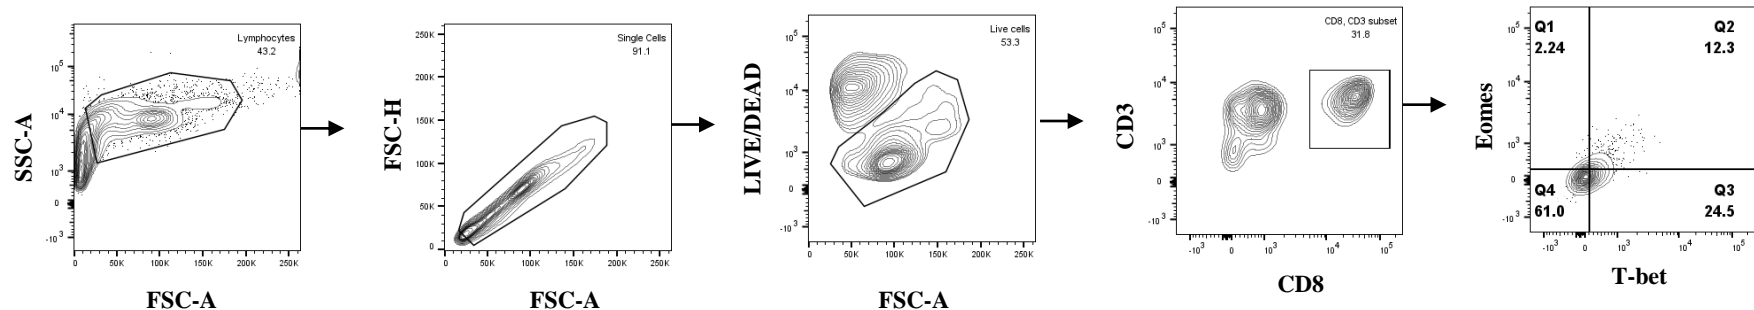

**Figure S4. Gating strategy to determine transcription factors from both SLE and healthy controls from PBMCs.**

**Figure S5**

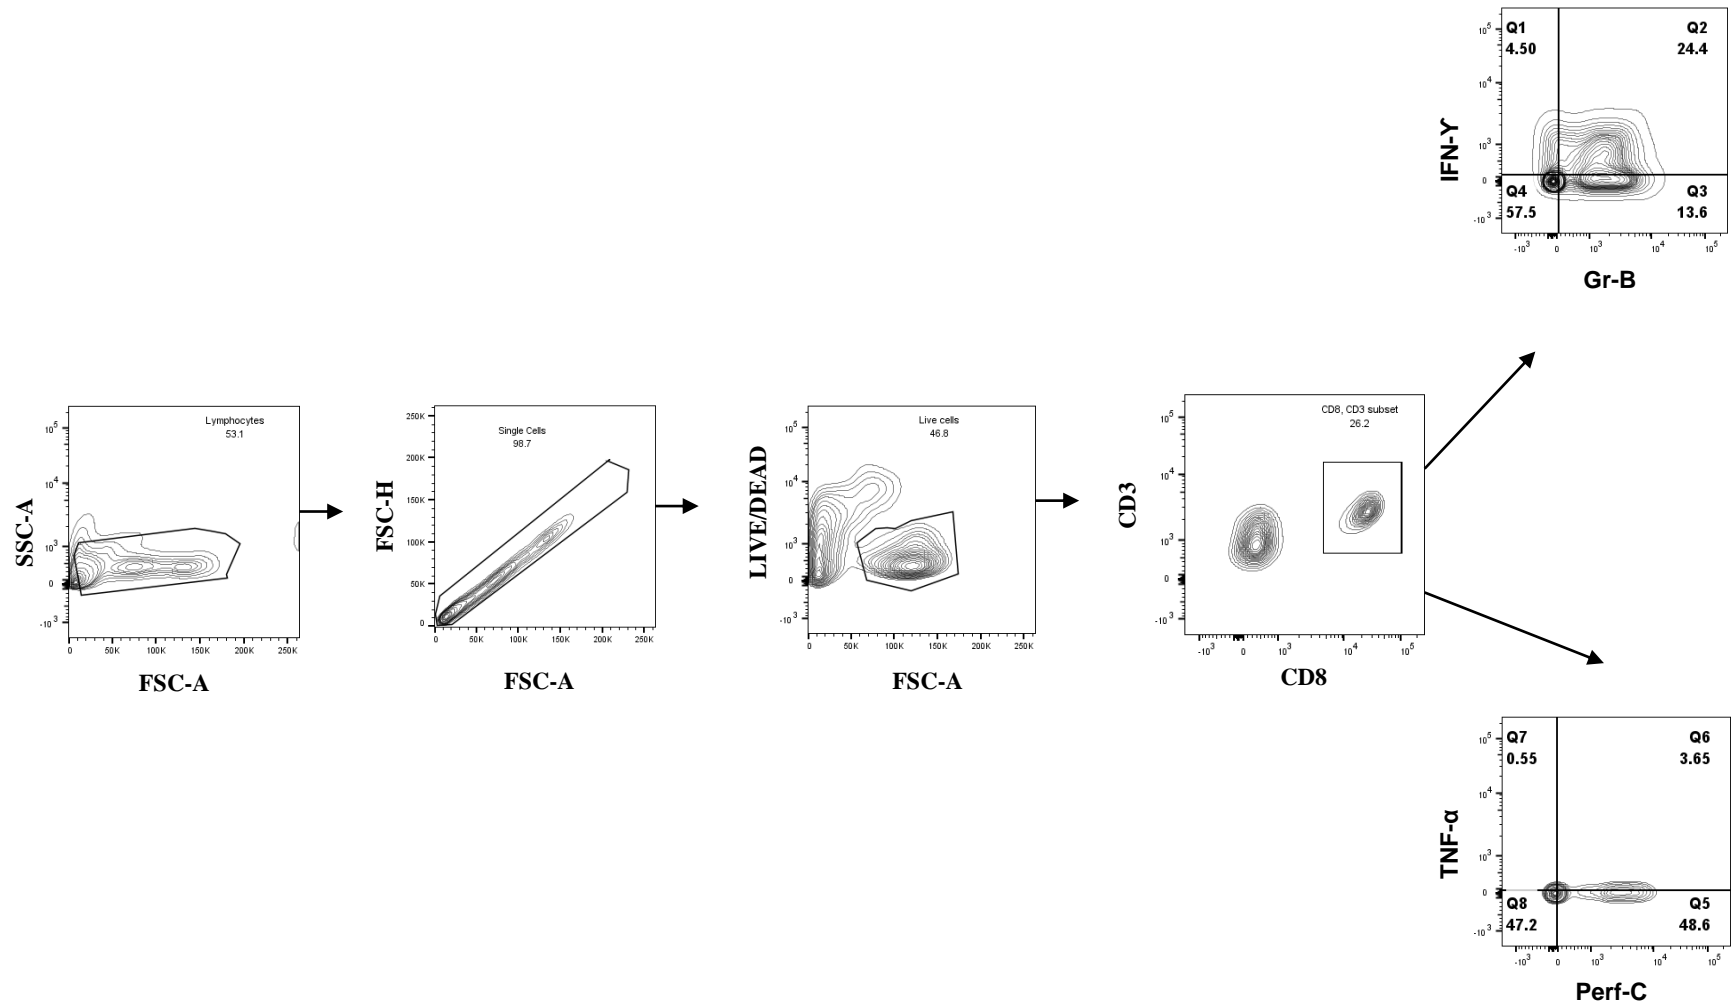

**Figure S5.** Gating strategy to determine cytotoxic and inflammatory cytokines from both SLE and healthy controls from PBMCs.

**Figure S6a**

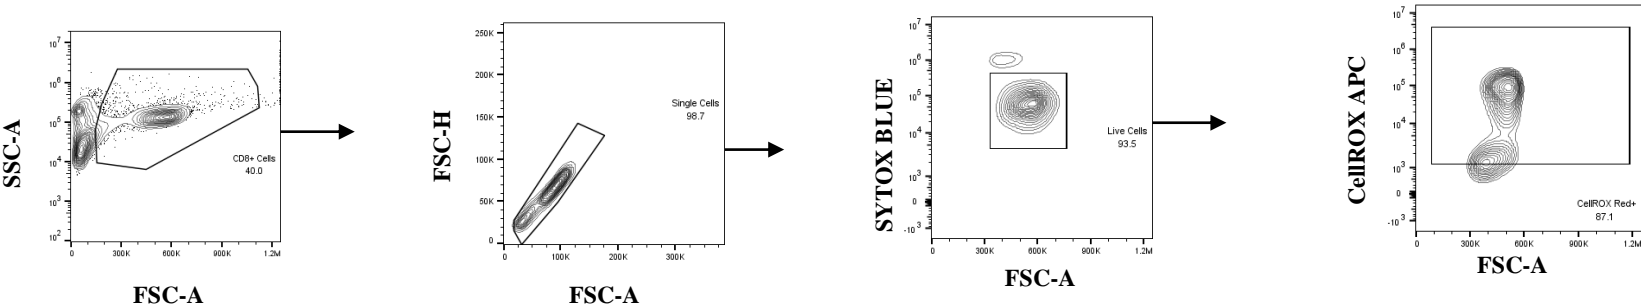

**Figure S6b**

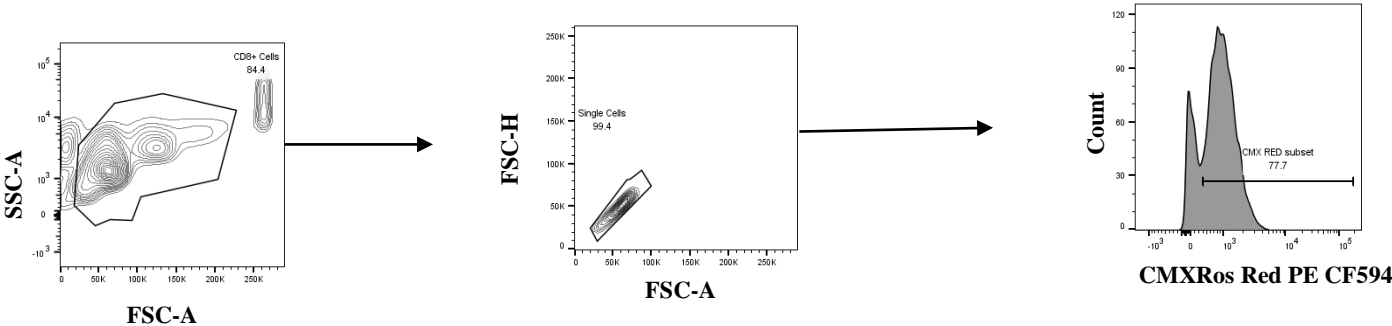

**Figure S6a. Gating strategy to determine cellular ROS in CD8+ T cells of both SLE patients and healthy controls.**  
**Figure S6b. Gating strategy to determine mitochondrial hyperpolarization in CD8+ T cells of SLE patients and healthy controls.**

**Figure S7**

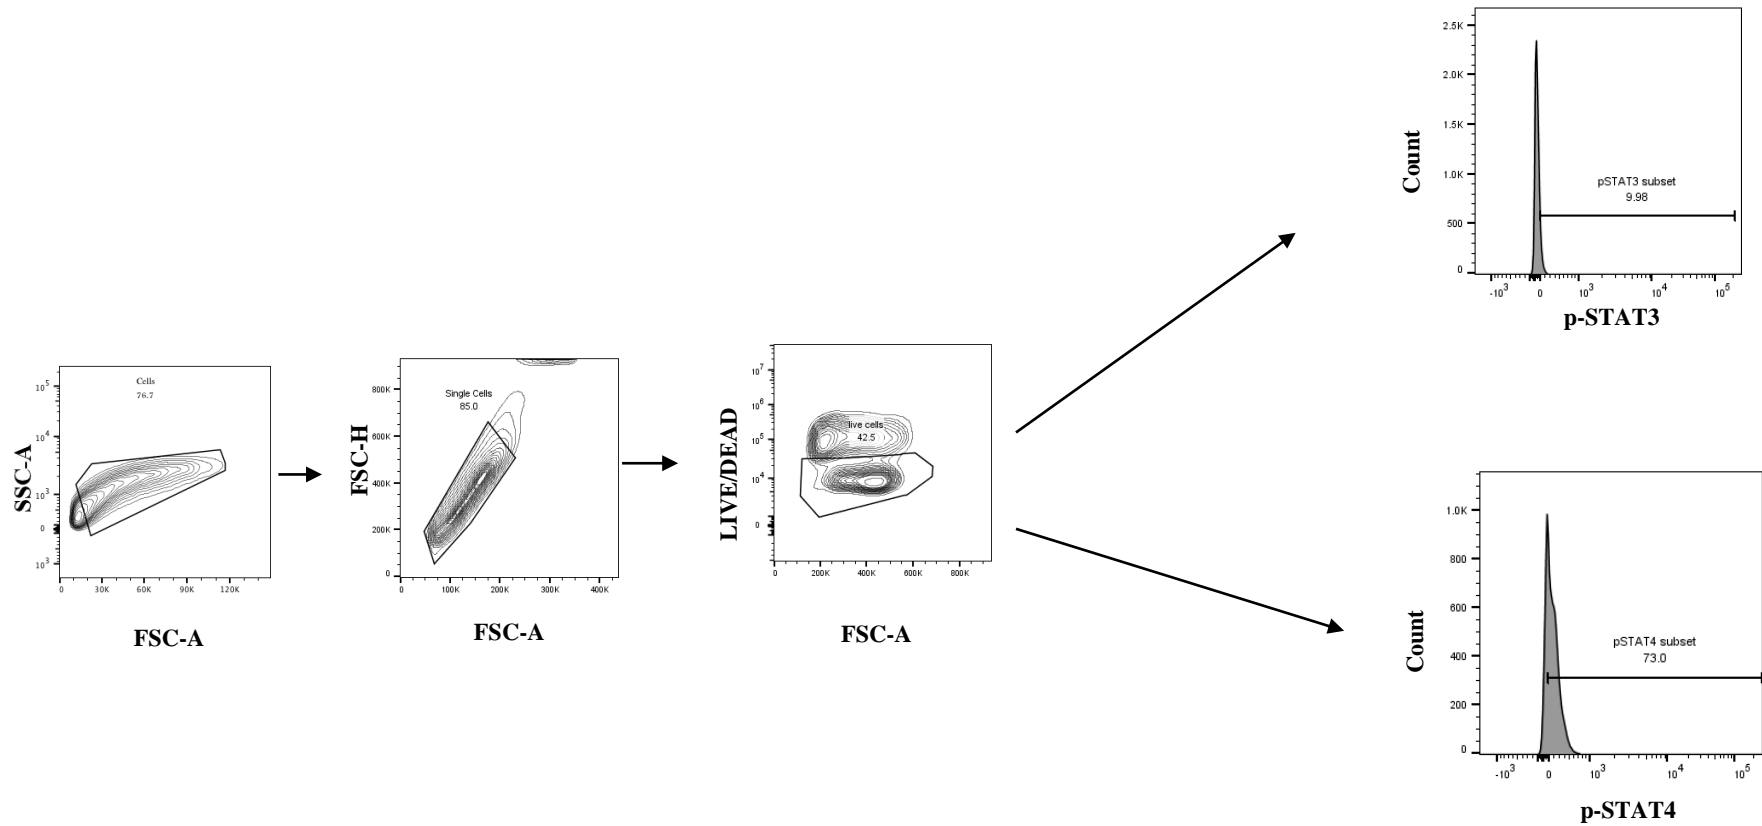

**Figure S7. Gating strategy to determine phospho -STAT proteins from CD8+ T cells of SLE patients and healthy controls.**

**Figure S8**

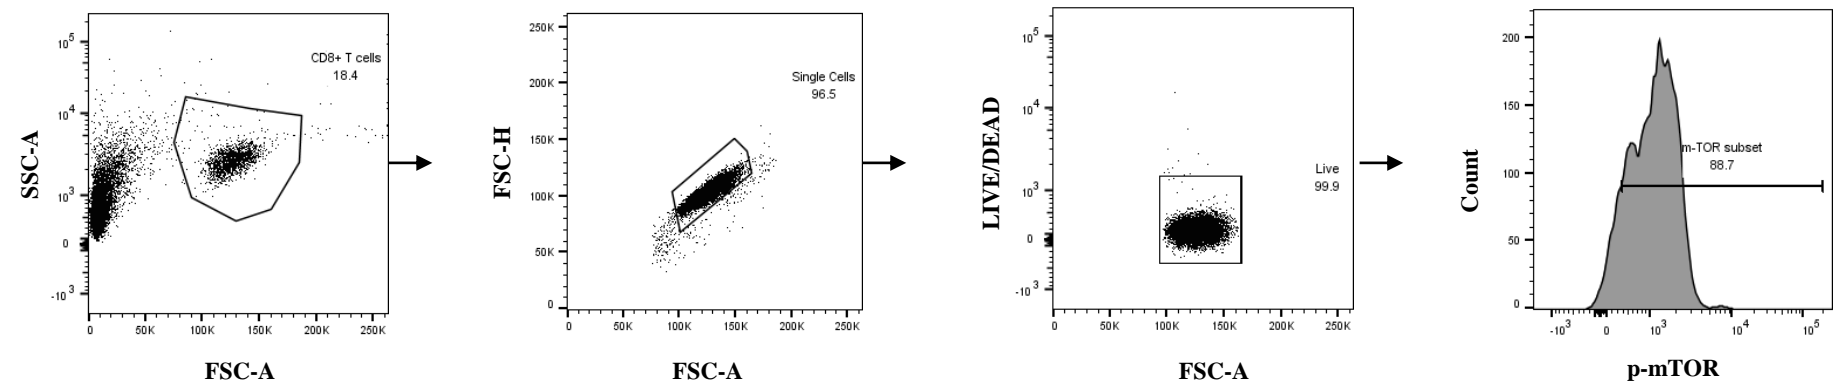

**Figure S8 . Gating strategy to determine phospho mTOR proteins from CD8+ T cells of SLE patients .**



**Figure S9**

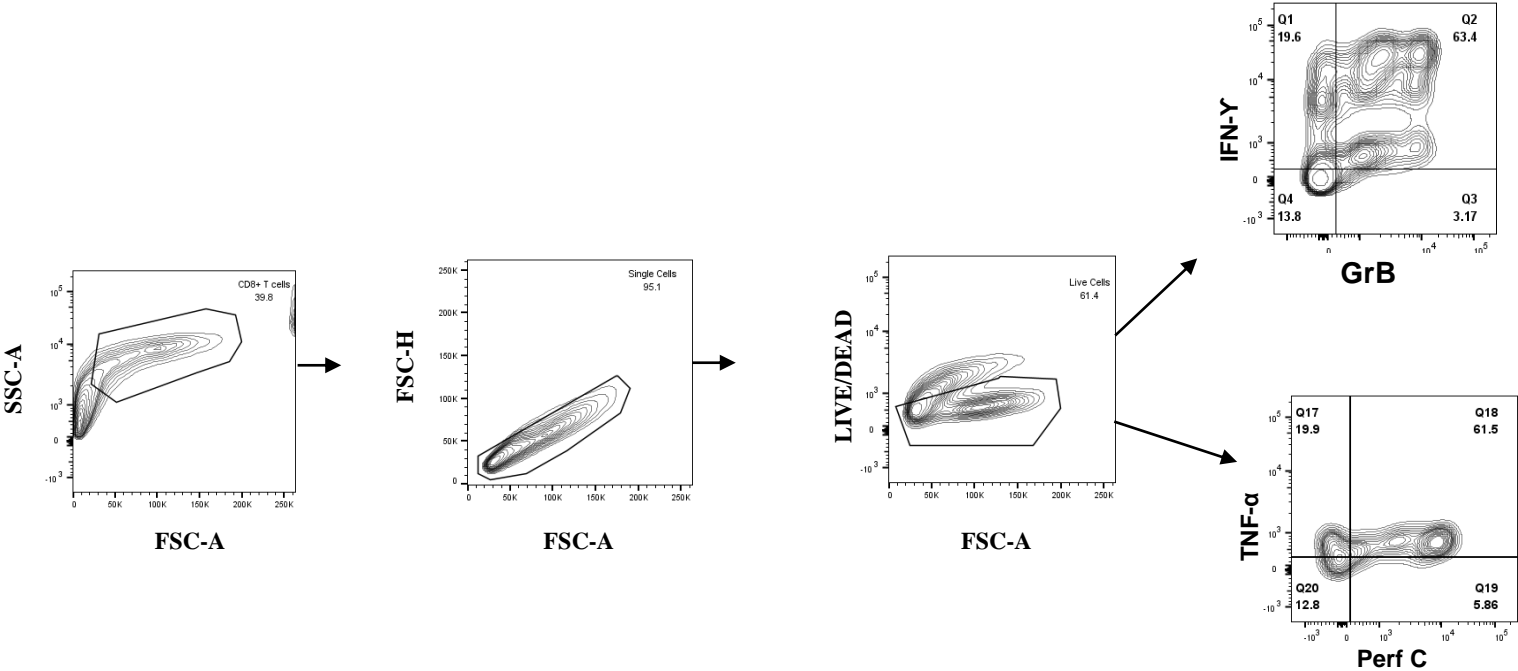

**Figure S9. Gating strategy to determine Cytotoxic and inflammatory molecules from Tc1 and Tc21 Cells.**
